# Supplementary material for: A carbon dot-based nanoscale covalent organic framework as a new emitter combined with a CRISPR/Cas12a-mediated electrochemiluminescence biosensor for ultrasensitive detection of bisphenol A
Source: Royal Society of Chemistry journal article supplement (doi:10.1039/d3an00024a), 2023-01-01
Supplement: d3an00024a1.pdf [file d3an00024a1.pdf]

**Carbon dots-based nanoscale covalent organic framework as a new emitter combined with CRISPR/Cas12a mediated electrochemiluminescence biosensor for ultrasensitive detection of bisphenol A**

Rongxian Ma,<sup>a</sup> Jiaxuan Jiang,<sup>a</sup> Yanfei Ya,<sup>a</sup> Yu Lin,<sup>a</sup> Yuyi Zhou,<sup>a</sup> Yeyu Wu,<sup>\*a</sup> Xuecai Tan,<sup>\*a</sup> KeJing Huang,<sup>a</sup> Fangkai Du,<sup>a</sup> Jingjuan Xu<sup>\*b</sup>

<sup>a</sup> School of Chemistry and Chemical Engineering, Guangxi Minzu University; Key Laboratory of Chemistry and Engineering of Forest Products, State Ethnic Affairs Commission; Guangxi Key Laboratory of Chemistry and Engineering of Forest Products; Guangxi Collaborative Innovation Center for Chemistry and Engineering of Forest Products; Key Laboratory of Applied Analytical Chemistry (Guangxi Minzu University), Education Department of Guangxi Zhuang Autonomous Region. Nanning 530006, China.

<sup>b</sup> State Key Laboratory of Analytical Chemistry for Life Science, School of Chemistry and Chemical Engineering, Nanjing University, Nanjing 210023, P. R. China.

\* Corresponding author

E-mail addresses: eveyeyu @163.com, gxuntan@126.com, xujj@nju.edu.cn (J. J Xu).

---

## Table of contents for supporting information

|                                                                 |    |
|-----------------------------------------------------------------|----|
| Sequence information of oligonucleotides used in this work----- | S3 |
| Materials and reagents-----                                     | S3 |
| Apparatus and instrumentation-----                              | S4 |
| Synthesis of Pt NPs-----                                        | S5 |
| Preparation of water samples-----                               | S5 |
| Experiment and calculation of ECL efficiency -----              | S6 |
| XPS survey of CDs-----                                          | S7 |
| Optimizations of the reaction conditions-----                   | S7 |
| Comparison of other methods for BPA detection-----              | S8 |
| Calculation of the limit of detection-----                      | S8 |
| Analysis of BPA in water samples-----                           | S9 |
| References-----                                                 | S9 |

---

**Table S1.** Sequence information of oligonucleotides used in this work.

---

| Name                              | Sequences (5' to 3')                                                        |
|-----------------------------------|-----------------------------------------------------------------------------|
| crRNA                             | UAAUUUCUACUAAGUGUAGAUUCCUGCGGAUUUACUGCCUG                                   |
| activator DNA                     | CCCAGGCAGTAAATCCGCAGGA                                                      |
| BPA aptamer*                      | NH <sub>2</sub> -C <sub>6</sub> -(T) <sub>10</sub> -GGATAGCGTTCCTGCGGATTTAC |
| Fc-ssDNA                          | SH-C <sub>6</sub> -TTATTTTATTTTATT-Fc                                       |
| ss-DNA for<br>gel electrophoresis | AGTTTCTGAAGTAGATATGGCAGCACATAATGACATATT                                     |

---

\*Indicates the selection of a truncated BPA aptamer.<sup>1</sup>

### Materials and reagents

1, 3, 5-Tris (4-aminophenyl) benzene (TPB), chloroplatinic acid (H<sub>2</sub>PtCl<sub>6</sub>·6H<sub>2</sub>O), estradiol (E2), tris (2-carboxyethyl) phosphine hydrochloride (TCEP) was purchased from Innochem technology Co., Ltd (China, Beijing). Ethanol (C<sub>2</sub>H<sub>5</sub>OH) was purchased from Sigma Aldrich Co., Ltd (Sigma, USA). Glutaraldehyde, 1,4-dioxane (C<sub>4</sub>H<sub>8</sub>O<sub>2</sub>), bisphenol A (BPA), bisphenol S (BPS), diethylstilbestrol (DES), potassium chloride (KCl), 6-mercapto-1-hexanol (MCH), sodium chloride (NaCl), disodium hydrogen phosphate (Na<sub>2</sub>HPO<sub>4</sub>), sodium dihydrogen phosphate (NaH<sub>2</sub>PO<sub>4</sub>), tetrabutylammonium hexafluorophosphate (Bu<sub>4</sub>NPF<sub>6</sub>) were obtained from Aladdin Reagent Co. Ltd (China, Shanghai). Potassium persulfate (K<sub>2</sub>S<sub>2</sub>O<sub>8</sub>), potassium ferricyanide (K<sub>3</sub>[Fe(CN)<sub>6</sub>]), ferrocyanide potassium (K<sub>4</sub>Fe(CN)<sub>6</sub>·3H<sub>2</sub>O), N-

---

hydroxysuccinimide (NHS), Tris(2,2-bipyridyl) dichlororuthenium (II) hexahydrate, 1-ethyl-3-(3-dimethyl-aminopropyl) carbodiimide hydrochloride (EDC) were purchased from Macklin Reagent Co. Ltd (China, Shanghai). Estrone (E1) and estriol (E3) were purchased from Ark Pharm Reagent Co. Ltd (USA). Cas12a and 10×Cas12a reaction solutions were purchased from Guangzhou Meige Biotechnology Co., Ltd. (China, Guangzhou). Carboxy magnetic beads (MB) were purchased from Tianjin Besile Chromatography Technology Development Center (China, Tianjin). Ultrapure water (resistivity  $>18.2 \text{ M}\Omega \text{ cm}^{-1}$  at  $25 \text{ }^\circ\text{C}$ ) was obtained from a Milli-Q water purification system (Millipore Corp., Bedford, MA, USA). All reagents were of analytical grade and used without further purification unless otherwise indicated. All other HPLC-purified oligonucleotides and RNA were acquired from Shanghai Sangon Bioengineering Co., Ltd and listed in the **TableS1**.

### **Apparatus and instrumentation**

MPI-B electrochemiluminescence detection system (Xi'an Remax Electronic Science & Technology Co., Ltd.). CHI760E Electrochemical Workstation (Shanghai Chenhua Instrument Co., Ltd.). PGSTAT 128N Electrochemical Workstation (Swiss Metrohm China Co., Ltd.). SUPRA 55 Sapphire field emission scanning electron microscope (SEM) (Carl Zeiss, Germany). D8 ADVANCE X-ray powder diffractometer (XRD) (Brocke AXS, Germany). Nicolet Is10 Fourier transform infrared spectrometer (IR) (Thermo Scientific, USA). Hitachi F-4600 fluorescence spectrophotometer (Hitachi, Japan). JEOL JEM 2100Plus transmission electron

---

microscope (TEM) (JEOL, Japan). Thermo Scientific K-Alpha X-ray photoelectron spectrometer (XPS) (Thermo Fisher, USA). The electrochemical test including cyclic voltammetric (CV) and electrochemical impedance spectroscopy (EIS). CV measurement was performed at a scan rate of 100mV/s, and the scan range is -0.2~0.6 V, EIS was tested in a 5 mM  $[\text{Fe}(\text{CN})_6]^{3-}/[\text{Fe}(\text{CN})_6]^{4-}$  solution (containing 0.1 mM KCl) within a frequency range of 0.1 Hz to 100 kHz.

### **Synthesis of Pt NPs**

Pt NPs were prepared according to the reported method.<sup>2</sup> In brief, 2 mL of 0.038 M  $\text{H}_2\text{PtCl}_6$  solution was added into 100 mL ultrapure water and heated to boiling. Then 1 mL of 0.3 M sodium citrate was injected into the above solution under vigorous stirring to reduce  $\text{H}_2\text{PtCl}_6$  to Pt NPs. After 40 min, the solution turned black. The solution was cooled down to room temperature under stirring, then concentrated and purified with an ultrafiltration tube (3 KD, 7500 rpm, 30 min) and stored at 4 °C in the dark for further use.

### **Preparation of water samples**

We collected real water samples including the Yong jiang river water, bottled water and tap water. Water sample was purified with a 0.45  $\mu\text{M}$  filter membrane before the measurement to eliminate the solid impurity, and then kept them in a clean glass bottle for further use. Finally,  $1 \times 10^{-9}$ ,  $1 \times 10^{-8}$ ,  $1 \times 10^{-7}$  mol/L BPA solutions were added to the water samples respectively.

---

## Experiment and calculation of ECL efficiency

We prepared 0.1 M  $K_2S_2O_8$  solution containing 1 mM  $[Ru(bpy)_3]^{2+}$  and 0.1 M  $Bu_4NPF_6$  as the standard (st) of the calculation of the overall ECL efficiency. Then 0.075 mg/ml of CDs and CD-COF were prepared respectively, 5  $\mu$ L of each were dropped on the electrode surface, dried naturally. In order to compare the ECL efficiency of CDs/  $S_2O_8^{2-}$ , CD-COF/ $S_2O_8^{2-}$ , CD-COF/ $S_2O_8^{2-}/Bu_4N^+$  systems, the modified electrode was tested in 10 mL of 0.1M PBS (pH 7.4) containing 0.1M  $K_2S_2O_8$  solution. For CD-COF/ $S_2O_8^{2-}/Bu_4N^+$  system, 1 mM  $Bu_4NPF_6$  needed to be added to the above solution. The voltage of the photomultiplier tube was set to 600 V, and the scanning potential ranged from -2 to 0 V.

The quantum efficiency for ECL is defined as the number of photons per electron transferred. The relative ECL efficiency was calculated using the relation below:<sup>3</sup>

$$\Phi_x = \Phi_{st} \left( \frac{\int_0^t I dt}{\int_0^t i dt} \right)_x / \left( \frac{\int_0^t I dt}{\int_0^t i dt} \right)_{st}$$

Here,  $\Phi_x$  represents the ECL efficiency of sample,  $\Phi_{st}$  is the ECL quantum efficiency of  $[Ru(bpy)_3]^{2+}$  (1 mM and 0.1 M  $Bu_4NPF_6$ /acetonitrile) via annihilation, taken as 5.0%, I is ECL intensity, i is current value, and x is the sample. The ECL efficiencies of different ECL systems were calculated based on eq1 and displayed in

**Table 1.**

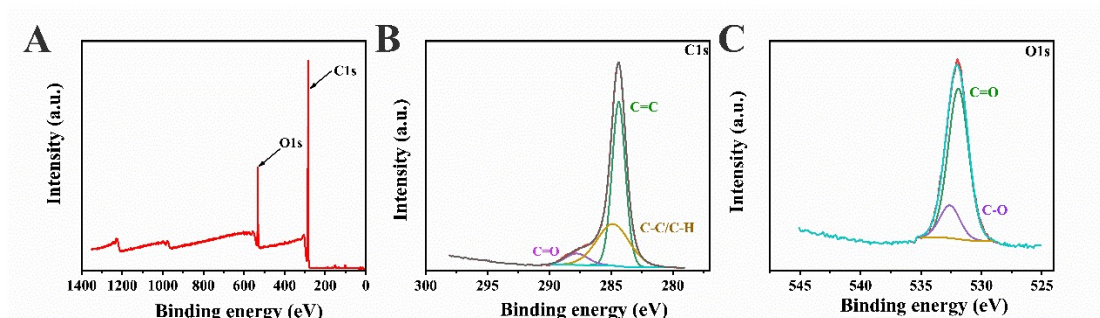

**Fig. S1.** XPS survey (A), C1 s (B), O1 s (C) spectra of CDs

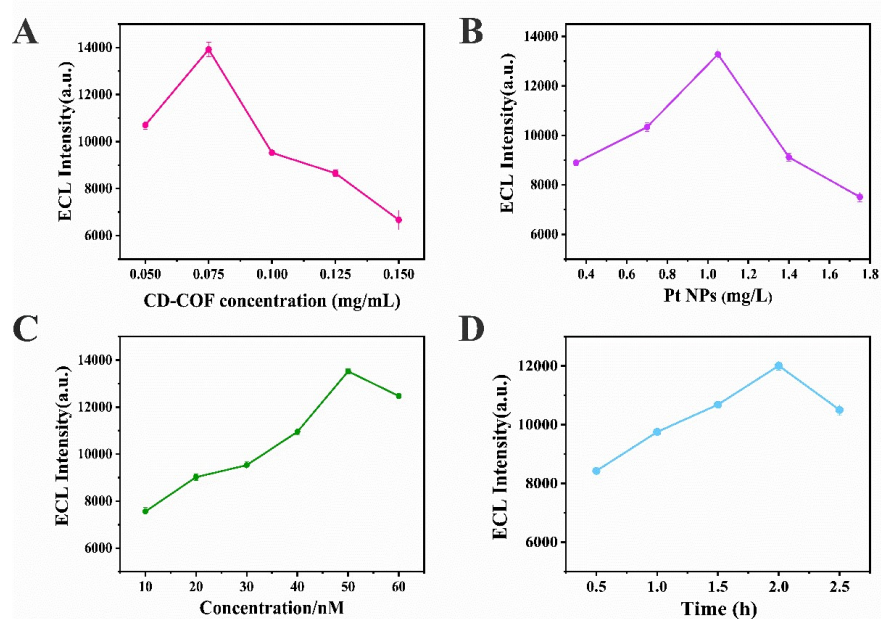

**Fig. S2.** Optimizations of CD-COF concentration (A). Pt NPs concentration (B). Cas12a-crRNA concentration (C) and cleavage time on Fc-ssDNA by the CRISPR-Cas12a system (D).

**Table S2.** Comparison of other methods for BPA detection

| Methods               | Linear range (M)                            | Detection limit<br>M) | Ref.      |
|-----------------------|---------------------------------------------|-----------------------|-----------|
| Electrochemical       | $1.0 \times 10^{-8} - 5.0 \times 10^{-5}$   | $3.2 \times 10^{-9}$  | 4         |
| Photoelectrochemistry | $5.0 \times 10^{-10} - 5.0 \times 10^{-5}$  | $1.8 \times 10^{-10}$ | 5         |
| ECL                   | $1.0 \times 10^{-9} - 5.0 \times 10^{-4}$   | $3.4 \times 10^{-10}$ | 6         |
| ECL                   | $9.0 \times 10^{-16} - 4.0 \times 10^{-10}$ | $3.0 \times 10^{-16}$ | 7         |
| ECL                   | $1.0 \times 10^{-10} - 1.0 \times 10^{-4}$  | $3.3 \times 10^{-11}$ | 8         |
| ECL                   | $1.0 \times 10^{-14} - 1.0 \times 10^{-5}$  | $2.2 \times 10^{-15}$ | This work |

### Calculation of the limit of detection

According to related references and the IUPAC recommendation<sup>9</sup> the limit of detection (LOD) in our work was determined as  $LOD = k S_B/m$ , where  $S_B$  represents the standard deviation of the blank signals ( $n_B=3$ ),  $m$  represents the analytical sensitivity which can be estimated as the slope of calibration curve at lower concentration ranges and  $k$  represents the number of blank samples setting as 3. Fig. 6C presented that ECL Intensity values (I/a.u.) was linearly related to the concentration of BPA (C/M) at a low concentration range. The corresponding linear equation was  $\Delta I = 1089.48 \lg C + 16056.81$  and the  $S_B$  of three times blank sample signal was about 80.31. Therefore, the LOD of the ECL biosensor was determined as 2.21 fM ( $LOD = 3 \times 80.31 \div 1089.48 = 2.21$  fM).



**Table S3.** Analysis of BPA in water samples.

| Sample                   | Added (nmol/L) | Found (nmol/L) | Recovery (%) | RSD (% , n=3) |
|--------------------------|----------------|----------------|--------------|---------------|
| Yongjiang<br>river water | 1              | 0.98           | 98           | 1.32          |
|                          | 10             | 10.95          | 110          | 1.29          |
|                          | 100            | 96.45          | 96           | 2.05          |
| Barreled water           | 1              | 1.04           | 104          | 2.71          |
|                          | 10             | 10.82          | 108          | 1.23          |
|                          | 100            | 95.70          | 96           | 2.36          |
| Tap water                | 1              | 0.91           | 91           | 0.61          |
|                          | 10             | 10.33          | 103          | 1.96          |
|                          | 100            | 107.96         | 108          | 2.12          |

## References

- 1 E.H. Lee, H.J. Lim, S.D. Lee, A. Son, ACS Appl. Mater. Interfaces., 2017, **9**, 14889-14898.
- 2 D. Feng, X. Tan, Y. Wu, C. Ai, Y. Luo, Q. Chen, H. Han, Biosens. Bioelectron., 2019, **129**, 100-106.
- 3 F. Wang, J. Lin, T. Zhao, D. Hu, T. Wu, Y. Liu, J. Am. Chem. Soc., 2016, **138**, 7718-7724.
- 4 A.G. Ramu, L. Telmenbayar, J. Theerthagiri, D. Yang, M. Song, D. Choi, New J. Chem., 2020, **44**, 18633-18645.

- 
- 5 R. Xu, Y. Du, L. Liu, D. Fan, L. Yan, X. Liu, H. Wang, Q. Wei, H. Ju, *Sensor. Actuat. B-Chem.*, 2021, **330**, 129387.
  - 6 J. Shi, X. Zhang, Q. Zhang, P. Yang, *Contam. Toxicol.*, 2022, **108**, 379-385.
  - 7 M.A. Kamyabi, M. Moharramnezhad, *J. Appl. Electrochem.*, 2021, **51**, 1371-1385.
  - 8 X. Liu, L. Luo, L. Li, Z. Di, J. Zhang, T. You, *Electrochim. Acta.*, 2019, **319**, 849-858.
  - 9 Long, G.L, Winefordner, J.D, *Anal. Chem.*, 1983, **55**, 712A-724A.
